# Supplementary material for: Towards the understanding of halogenation in peptide hydrogels: a quantum chemical approach
Source: Royal Society of Chemistry journal article supplement (doi:10.1039/d1ma00455g), 2021-01-01

## Supporting Information

### Towards the Understanding of Halogenation in Peptide Hydrogels: a Quantum Chemical Approach

Tom Bettens,<sup>[a]</sup> Valentin Lacanau,<sup>[b]</sup> Ruben Van Lommel,<sup>[a,c]</sup> Tess De  
Maeseneer,<sup>[d]</sup> Wouter Vandeplassche,<sup>[b]</sup> Jolien Bertouille,<sup>[b]</sup> Joost Brancart,<sup>[e]</sup>  
Thomas M. A. Barlow,<sup>[b]</sup> Tatiana Woller,<sup>[a]</sup> Niko Van den Brande,<sup>[e]</sup> Paula  
Moldenaers,<sup>[d]</sup> Frank De Proft,<sup>[a]</sup> Annemieke Madder,<sup>[f]</sup> Richard Hoogenboom,<sup>[g]</sup>  
Charlotte Martin,<sup>[b]</sup> Steven Ballet,<sup>\*[b]</sup> and Mercedes Alonso<sup>\*[a]</sup>

- [a] Department of General Chemistry (ALGC), Faculty of Science and Bio-engineering Sciences, Vrije Universiteit Brussel (VUB), Pleinlaan 2, 1050 Brussels, Belgium
- [b] Research Group of Organic Chemistry (ORGC), Faculty of Science and Bio-engineering Sciences, Vrije Universiteit Brussel (VUB), Pleinlaan 2, 1050 Brussels, Belgium
- [c] Molecular Design and Synthesis, Department of Chemistry, KU Leuven, Celestijnenlaan 200F Leuven Chem&Tech, box 2404, 3001 Leuven, Belgium
- [d] Smart Matter, Rheology, and Technology Department of Chemical Engineering KU Leuven, Celestijnenlaan 200J, P.B. 2424, 3001 Leuven, Belgium
- [e] Physical Chemistry and Polymer Science (FYSC), Vrije Universiteit Brussel (VUB), Pleinlaan 2, 1050 Brussels, Belgium
- [f] Organic and Biomimetic Chemistry Research Group (OBCR), Department of Organic and Macromolecular Chemistry, Ghent University, Krijgslaan 281 S4, 9000 Ghent, Belgium
- [g] Supramolecular Chemistry Group, Centre of Macromolecular Chemistry (CMaC), Department of Organic and Macromolecular Chemistry, Ghent University, Krijgslaan 281 S4, 9000 Ghent, Belgium

E-mail: [steven.ballet@vub.be](mailto:steven.ballet@vub.be)  
E-mail: [mercedes.alonso.giner@vub.be](mailto:mercedes.alonso.giner@vub.be)

This PDF file includes:

- I. Benchmarking of quantum mechanical methods for non-covalent interactions in halogenated stacked dimers
- II. Systematic search over stacked dimer configurations
- III. Mutual relationships between interaction energies, integrated volumes of the NCI regions and intermonomer distances
- IV. Energy decomposition analysis for the full set of mono- and double-halogenated dimers
- V. Material and reagents
- VI. Experimental methods
- VII. Peptide characterization
- VIII. Rheological data

## I. Benchmarking of quantum mechanical methods for non-covalent interactions in halogenated stacked dimers

**Table S1.** Comparison of the interaction energies computed with different quantum mechanical methods for a set of stacked Phe...Phe dimers.<sup>[a]</sup>

| System      | CCSD(T)-F12b | M06   | CCSD-F12b | DF-MP2 | DF-SCS-MP2-F12 |
|-------------|--------------|-------|-----------|--------|----------------|
| <b>H</b>    | -5.88        | -4.43 | -4.05     | -9.78  | -5.23          |
| <b>oF</b>   | -6.12        | -4.53 | -4.09     | -10.56 | -5.56          |
| <b>mF</b>   | -5.76        | -4.35 | -3.83     | -9.91  | -5.18          |
| <b>pF</b>   | -5.89        | -4.50 | -3.90     | -10.26 | -5.40          |
| <b>oCl</b>  | -6.48        | -4.86 | -4.32     | -11.32 | -5.95          |
| <b>mCl</b>  | -6.47        | -4.88 | -4.24     | -11.43 | -5.93          |
| <b>pCl</b>  | -6.40        | -5.04 | -4.28     | -11.20 | -5.91          |
| <b>MAE</b>  | -            | 1.49  | 2.04      | 4.50   | 0.55           |
| <b>RMSE</b> | -            | 2.22  | 4.17      | 20.36  | 0.30           |

[a] The interaction energies for explicitly-correlated methods were computed with the aug-cc-pVDZ for all atoms, whereas the M06 energies were evaluated with the aug-cc-pVTZ basis set. All these energies were obtained from single-point calculations on the optimized geometries at the M06/cc-pVTZ level of theory. No counterpoise corrections were considered in the benchmark.

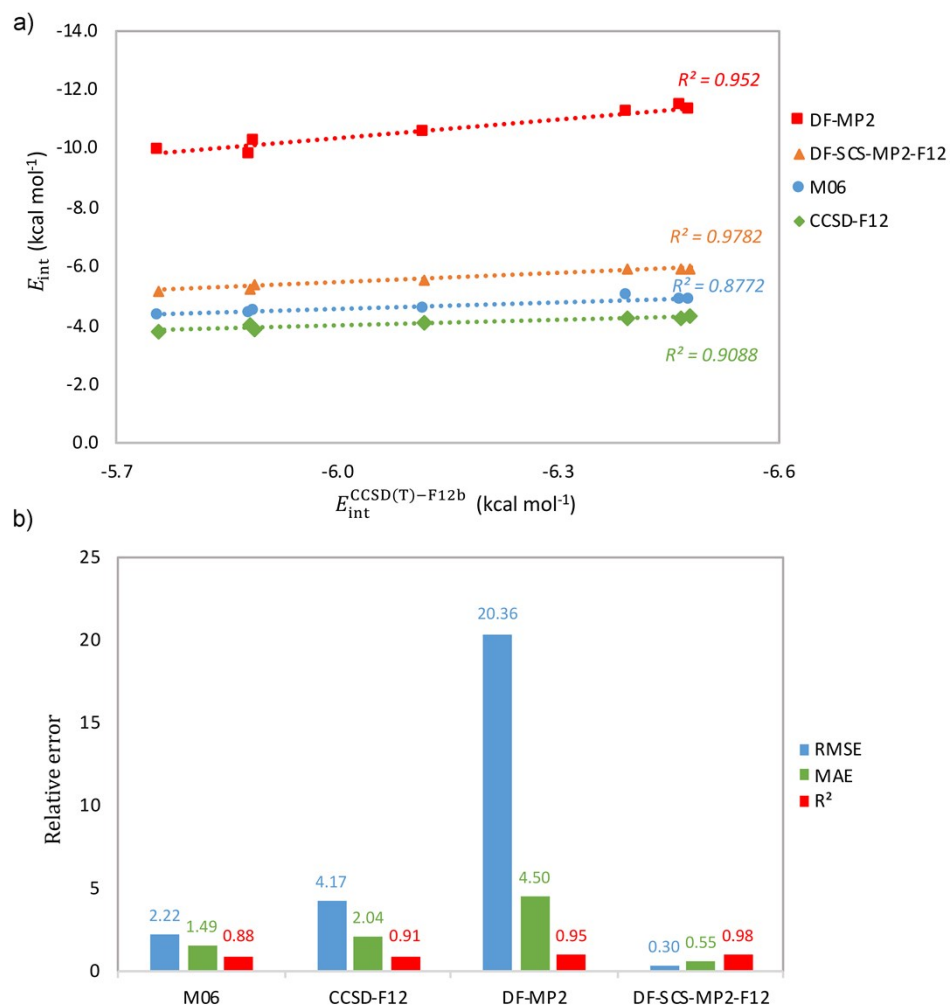

**Figure S1.** Mean absolute error (MAE) and root-mean-square error RMSE (in kcal mol<sup>-1</sup>) relative to CCSD(T)-F12 for describing the interaction energies of selected stacked Phe⋯Phe dimers. The correlation coefficient ( $R^2$ ) for the different methods is also shown.

## II. Systematic search over stacked dimer configurations

**Table S2.** Relative electronic energies (in kcal mol<sup>-1</sup>) for different stacked dimer configurations.

| Conf. | $E_{rel}^{[a]}$ | $E_{rel}^{CP [b]}$ |
|-------|-----------------|--------------------|-----------------|--------------------|-----------------|--------------------|-----------------|--------------------|
|       | <b>H</b>        |                    | <b>oF</b>       |                    | <b>mF</b>       |                    | <b>pF</b>       |                    |
| 1     | 0.56            | 0.88               | 0.21            | 0.12               | 1.34            | 0.65               | 0.51            | 0.21               |
| 2     | 0.55            |                    | 0.57            | <b>0.00</b>        | 0.32            | 0.00               | 0.00            | <b>0.00</b>        |
| 3     | 0.57            |                    | 0.30            | 0.19               | 0.00            | 0.29               | 0.92            | 1.06               |
| 4     | 0.00            | 0.57               | 0.35            | 0.30               | 0.88            | 0.36               | 0.34            | 0.24               |
| 5     | 0.05            | <b>0.00</b>        | 0.00            | 0.19               | 0.41            | 0.30               |                 |                    |
| 6     | 0.52            | 0.31               | 0.34            | 0.20               | 1.49            | 0.75               |                 |                    |
|       | <b>oFo</b>      |                    | <b>oFm</b>      |                    | <b>oFp</b>      |                    | <b>mFm</b>      |                    |
| 1     | 0.96            |                    | 0.78            |                    | 0.00            | 0.18               | 1.02            |                    |
| 2     | 0.54            |                    | 0.16            | <b>0.00</b>        | 0.12            | <b>0.00</b>        | 0.88            |                    |
| 3     | 2.01            |                    | 0.21            |                    | 0.95            |                    | 0.53            | 0.98               |
| 4     | 0.53            |                    | 0.00            | 0.12               | 0.68            |                    | 0.96            |                    |
| 5     | 1.33            |                    | 0.54            |                    | 0.26            | 0.52               | 0.00            | <b>0.00</b>        |
| 6     | 0.19            | <b>0.00</b>        | 1.18            |                    | 0.84            |                    | 1.15            |                    |
| 7     | 0.80            |                    | 1.14            |                    |                 |                    | 0.65            | 0.41               |
| 8     | 0.74            |                    | 0.89            |                    |                 |                    | 1.61            |                    |
| 9     | 0.51            | 0.46               | 0.34            |                    |                 |                    | 0.56            |                    |
| 10    | 0.58            |                    | 0.68            |                    |                 |                    | 0.68            |                    |
| 11    | 0.00            | 0.05               | 0.14            | 0.28               |                 |                    | 0.78            |                    |
| 12    | 0.92            |                    | 0.58            |                    |                 |                    | 1.43            |                    |
|       | <b>mFp</b>      |                    | <b>pFp</b>      |                    |                 |                    |                 |                    |
| 1     | 0.48            |                    | 1.11            |                    |                 |                    |                 |                    |
| 2     | 0.69            |                    | 0.81            |                    |                 |                    |                 |                    |
| 3     | 0.31            |                    | 0.84            |                    |                 |                    |                 |                    |
| 4     | 0.19            | 0.66               | 0.00            | <b>0.00</b>        |                 |                    |                 |                    |
| 5     | 0.00            | <b>0.00</b>        | 0.49            | 0.44               |                 |                    |                 |                    |
| 6     | 0.28            | 0.56               | 0.75            | 0.08               |                 |                    |                 |                    |

<sup>[a]</sup> Relative energies computed from the ZPVE-corrected electronic energies at the M06/cc-pVTZ level of theory. <sup>[b]</sup> For the most stable dimer configurations, the relative energies were recomputed at the M06/aug-cc-pVTZ level of theory including the Counterpoise correction.

### III. Mutual relationships between interaction energies, integrated volumes of the NCI regions and intermonomer distances

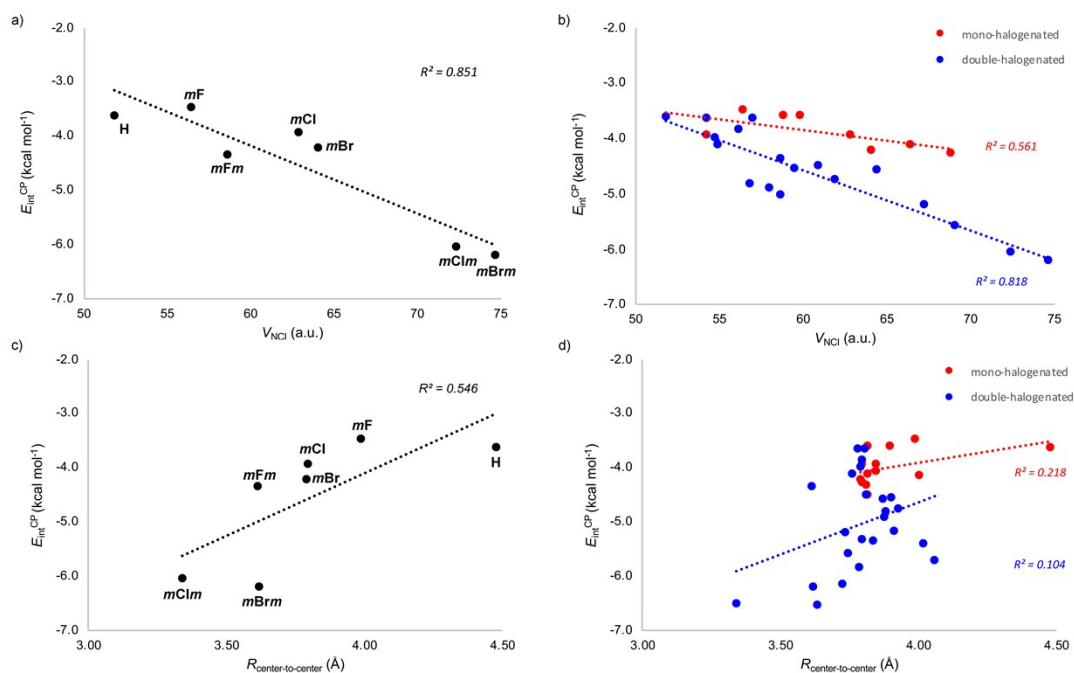

**Figure S2.** Correlation between the counterpoise-corrected interaction energies and the integrated volume of the NCI region and the centroid-centroid distance, respectively. a) and c) show the correlations for *meta*-substituted Phe··Phe dimers, whereas b) and d) correspond to the full set of dimers as a function of the number of heteroatoms.

#### IV. Energy decomposition analysis for the full set of mono- and double-halogenated dimers

**Table S3.** Energy decomposition analysis on the mono- and double-halogenated dimers. The energy components (in kcal mol<sup>-1</sup>) correspond to electrostatic interactions ( $\Delta E_{\text{elst}}$ ), orbital interaction ( $\Delta E_{\text{oi}}$ ) and Pauli repulsion ( $\Delta E_{\text{Pauli}}$ ) between deformed monomers.<sup>[a]</sup>

| System            | $\Delta E_{\text{elst}}$ | $\Delta E_{\text{Pauli}}$ | $\Delta E_{\text{oi}}$ | System             | $\Delta E_{\text{elst}}$ | $\Delta E_{\text{Pauli}}$ | $\Delta E_{\text{oi}}$ |
|-------------------|--------------------------|---------------------------|------------------------|--------------------|--------------------------|---------------------------|------------------------|
| <b>H</b>          | -15.3                    | 40.4                      | -27.9                  | <b><i>oFo</i></b>  | -17.12                   | 48.92                     | -34.37                 |
| <b><i>oF</i></b>  | -16.1                    | 44.3                      | -31.0                  | <b><i>oFm</i></b>  | -18.41                   | 50.62                     | -35.55                 |
| <b><i>mF</i></b>  | -16.4                    | 49.6                      | -36.4                  | <b><i>oFp</i></b>  | -16.74                   | 46.56                     | -32.86                 |
| <b><i>pF</i></b>  | -16.2                    | 46.1                      | -32.8                  | <b><i>mFm</i></b>  | -20.93                   | 50.62                     | -33.63                 |
| <b><i>oCl</i></b> | -17.0                    | 45.9                      | -32.1                  | <b><i>mFp</i></b>  | -18.46                   | 47.18                     | -32.34                 |
| <b><i>mCl</i></b> | -19.0                    | 53.7                      | -38.4                  | <b><i>pFp</i></b>  | -14.06                   | 38.34                     | -26.83                 |
| <b><i>pCl</i></b> | -16.9                    | 47.8                      | -34.2                  | <b><i>oClo</i></b> | -18.27                   | 51.82                     | -37.61                 |
| <b><i>oBr</i></b> | -17.2                    | 46.5                      | -32.6                  | <b><i>oClm</i></b> | -17.63                   | 46.91                     | -33.38                 |
| <b><i>mBr</i></b> | -18.8                    | 52.7                      | -37.7                  | <b><i>oClp</i></b> | -17.56                   | 49.25                     | -35.91                 |
| <b><i>pBr</i></b> | -16.7                    | 43.5                      | -30.7                  | <b><i>mClm</i></b> | -24.28                   | 60.53                     | -41.79                 |
| <b><i>oI</i></b>  | -15.7                    | 42.9                      | -30.6                  | <b><i>mClp</i></b> | -20.04                   | 51.72                     | -36.05                 |
| <b><i>mI</i></b>  | -19.1                    | 54.5                      | -39.3                  | <b><i>pClp</i></b> | -17.18                   | 48.84                     | -35.02                 |
| <b><i>pI</i></b>  | -17.5                    | 48.5                      | -35.1                  | <b><i>oBro</i></b> | -17.41                   | 47.38                     | -34.25                 |
|                   |                          |                           |                        | <b><i>oBrm</i></b> | -17.40                   | 46.09                     | -33.04                 |
|                   |                          |                           |                        | <b><i>oBrp</i></b> | -19.60                   | 52.99                     | -38.10                 |
|                   |                          |                           |                        | <b><i>mBrm</i></b> | -24.89                   | 61.48                     | -42.44                 |
|                   |                          |                           |                        | <b><i>mBrp</i></b> | -20.58                   | 52.12                     | -36.77                 |
|                   |                          |                           |                        | <b><i>pBrp</i></b> | -15.74                   | 44.87                     | -33.42                 |
|                   |                          |                           |                        | <b><i>oIo</i></b>  | -19.69                   | 54.55                     | -39.71                 |
|                   |                          |                           |                        | <b><i>oIm</i></b>  | -23.76                   | 59.65                     | -41.81                 |
|                   |                          |                           |                        | <b><i>oIp</i></b>  | -17.62                   | 46.25                     | -33.61                 |
|                   |                          |                           |                        | <b><i>mIm</i></b>  | -25.49                   | 63.79                     | -44.57                 |
|                   |                          |                           |                        | <b><i>mIp</i></b>  | -21.40                   | 54.97                     | -39.18                 |
|                   |                          |                           |                        | <b><i>pIp</i></b>  | -14.87                   | 31.74                     | -21.64                 |

## V. Material and reagents

All the amino acids (Fmoc protected), the rink amide resin (loading 0.47 mmol/g) and the coupling reagent (HBTU) were purchased from IRIS Biotech GMBH. The reagents 4-methylpiperidine, diisopropylethylamine, triisopropylsilane and dimethyl sulfoxide (DMSO) were obtained from Sigma-Aldrich. Trifluoroacetic acid (TFA) was purchased from Fluorochem. The solvents *N,N*-dimethylformamide 99.5% (DMF) and methanol 99.8% (MeOH) were purchased from Acros Organics, while the solvents dichloromethane analytical grade (DCM) and the acetonitrile HPLC gradient grade were purchased from Fisher Chemical. The Milli-Q water was obtained after purification through a Millipore Simplicity UV system.

## VI. Experimental methods

### ***Peptide synthesis and purification***

Peptides were synthesized manually using standard Fmoc-strategy solid-phase peptide synthesis (SPPS) on Rink amide resin. All couplings were performed using 3 equivalents (equiv.) of Fmoc-protected amino acids, 3 equiv. of coupling reagent (HBTU) and 5 equiv. of DIPEA in DMF for 45 min. Fmoc deprotection was carried out by treatment of the resin with 20% 4-methylpiperidine in DMF for 5 and 15 min. After completion of the sequence, the peptide was cleaved from the resin and the protecting groups were concomitantly removed by using a mixture of TFA/TIS/H<sub>2</sub>O (95:2.5:2.5) for 4 h at room temperature.

The crude peptides were purified by preparative reverse phase high-performance liquid chromatography (Gilson Middleton system with Gilson 322 pumps, controlled by the software package Unipoint) using water (containing 0.1% TFA) and acetonitrile (containing 0.1% TFA) as eluents. The pure peptides (>95% purity) were obtained after lyophilization and were characterized by electrospray ionization mass spectrometry on a Micromass Q-ToF Micro spectrometer.

### ***Peptide gelation***

The peptide gelation was performed by dissolving the TFA salt of the hydrogelator (6 mg) in 300  $\mu$ L of buffer solution (PBS). After successive vortexing and sonication, the formed hydrogel was left to rest overnight at room temperature.

### ***Dynamic rheometry***

By using dynamic rheometry, the  $G'$  and  $G''$  are determined. The  $G'$  refers to the elastic modulus and reflects elastic behavior of a material when deformed. The  $G''$  refers to the viscous modulus, which reflects the flow of a material while it is deformed. Mechanical properties of the hydrogels, prepared as described above, were evaluated at 34°C (AR-G2 Rheometer from TA Instruments (Delaware, USA) 24h after gelation, samples were transferred with a spatula onto a profiled cross hatched 15 mm parallel plate geometry, after which the gap height was adjusted to 500 nm. Water evaporation was minimized by covering the sample edges with low viscous mineral oil (Sigma Aldrich, BioReagent, for molecular biology). After loading, the stabilization of the gels was determined with a first 2h time sweep (frequency of 1.6Hz). Frequency sweep tests with the frequency ranging from 0.01 to 10Hz were conducted at a strain within the linear viscoelastic region (1% strain). Followed by a strain sweep performed starting from 0.1% to 100%. Then the recovery of samples was evaluated by the implementation of a dynamic shear step, which consisted of the application of 500% oscillatory strain during 5 s (frequency of 1.6Hz), after which the restructuring of the gels was evaluated by returning to analytical conditions during a 2h time sweep (frequency of 1.6Hz). The final  $G'$  were obtained by taking the average of the  $G'$  value during the frequency sweep at 1.6Hz for 3 measurements. The experimental data of the frequency test for all investigated peptide hydrogelators (measured in triplicate) is included at the end of this supporting information.

## VII. Peptide characterization

**Table S4.** Compound number, sequences and characterization of the halogenated peptide library synthesized from the parent sequence H-FQFQFK-NH<sub>2</sub>.

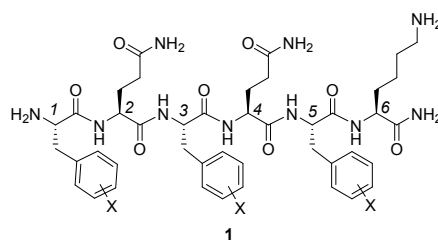

| N° | Sequence                                                           | Yield (%) | R <sub>t</sub> <sup>[a]</sup> (min) | HRMS-[H <sup>+</sup> ] Calc | HRMS-[H <sup>+</sup> ] Found |
|----|--------------------------------------------------------------------|-----------|-------------------------------------|-----------------------------|------------------------------|
| 1  | H-F <sup>1</sup> QF <sup>3</sup> QF <sup>5</sup> K-NH <sub>2</sub> | 59        | 2.73                                | 843.4439                    | 843.4421                     |
| 5  | H-F(p-I)QFQFK-NH <sub>2</sub>                                      | 42        | 2.91                                | 969.3406                    | 969.3484                     |
| 6  | H-FQF(p-I)QFK-NH <sub>2</sub>                                      | 10        | 2.91                                | 969.3406                    | 969.3484                     |
| 7  | H-FQFQF(p-I)K-NH <sub>2</sub>                                      | 39        | 2.90                                | 969.3406                    | 969.3391                     |
| 8  | H-F(m-I)QFQFK-NH <sub>2</sub>                                      | 45        | 2.91                                | 969.3406                    | 969.3456                     |
| 9  | H-FQF(m-I)QFK-NH <sub>2</sub>                                      | 38        | 2.92                                | 969.3406                    | 969.3406                     |
| 10 | H-FQFQF(m-I)K-NH <sub>2</sub>                                      | 34        | 2.93                                | 969.3406                    | 969.3402                     |
| 11 | H-F(o-I)QFQFK-NH <sub>2</sub>                                      | 46        | 2.86                                | 969.3406                    | 969.3484                     |
| 12 | H-FQF(o-I)QFK-NH <sub>2</sub>                                      | 53        | 2.89                                | 969.3406                    | 969.3484                     |
| 13 | H-FQFQF(o-I)K-NH <sub>2</sub>                                      | 57        | 2.88                                | 969.3406                    | 969.3484                     |
| 14 | H-F(p-I)QFQF(p-I)K-NH <sub>2</sub>                                 | 64        | 3.05                                | 1095.2372                   | 1095.2358                    |
| 15 | H-F(m-I)QFQF(m-I)K-NH <sub>2</sub>                                 | 43        | 3.04                                | 1095.2372                   | 1095.2394                    |
| 16 | H-F(o-I)QFQF(o-I)K-NH <sub>2</sub>                                 | 43        | 3.06                                | 1095.2372                   | 1095.2394                    |
| 17 | H-F(p-I)QF(p-I)QF(p-I)K-NH <sub>2</sub>                            | 23        | 3.25                                | 1221.1338                   | 1221.1417                    |
| 18 | H-F(m-I)QF(m-I)QF(m-I)K-NH <sub>2</sub>                            | 42        | 3.27                                | 1221.1338                   | 1221.1417                    |
| 19 | H-FQFQF(p-Br)K-NH <sub>2</sub>                                     | 47        | 2.85                                | 921.3544                    | 921.3596                     |
| 20 | H-F(m-Br)QFQFK-NH <sub>2</sub>                                     | 43        | 2.86                                | 921.3544                    | 921.3568                     |
| 21 | H-FQF(m-Br)QFK-NH <sub>2</sub>                                     | 40        | 2.84                                | 921.3544                    | 921.3544                     |
| 22 | H-FQFQF(m-Br)K-NH <sub>2</sub>                                     | 43        | 2.85                                | 921.3544                    | 921.3568                     |
| 23 | H-F(p-Br)QFQF(p-Br)K-NH <sub>2</sub>                               | 52        | 3.05                                | 1001.7910                   | 1001.7979                    |
| 24 | H-F(m-Br)QFQF(m-Br)K-NH <sub>2</sub>                               | 54        | 2.93                                | 1001.7910                   | 1001.7920                    |
| 25 | H-F(p-Br)QF(p-Br)QF(p-Br)K-NH <sub>2</sub>                         | 41        | 3.20                                | 1080.6930                   | 1080.6955                    |
| 26 | H-F(m-Br)QF(m-Br)QF(m-Br)K-NH <sub>2</sub>                         | 55        | 3.01                                | 1080.6930                   | 1080.6938                    |
| 27 | H-FQFQF(p-Cl)K-NH <sub>2</sub>                                     | 44        | 2.86                                | 877.4049                    | 877.4057                     |
| 28 | H-F(m-Cl)QFQFK-NH <sub>2</sub>                                     | 35        | 2.85                                | 877.4049                    | 877.4128                     |
| 29 | H-FQF(m-Cl)QFK-NH <sub>2</sub>                                     | 40        | 2.87                                | 877.4049                    | 877.4128                     |
| 30 | H-FQFQF(m-Cl)K-NH <sub>2</sub>                                     | 57        | 2.89                                | 877.4049                    | 877.4015                     |
| 31 | H-F(m-Cl)QFQF(m-Cl)K-NH <sub>2</sub>                               | 39        | 2.96                                | 911.3660                    | 911.3666                     |
| 32 | H-F(p-Cl)QF(p-Cl)QF(p-Cl)K-NH <sub>2</sub>                         | 54        | 3.12                                | 911.3660                    | 911.3612                     |
| 33 | H-F(m-F)QFQFK-NH <sub>2</sub>                                      | 38        | 2.75                                | 861.4345                    | 861.4423                     |
| 34 | H-FQF(m-F)QFK-NH <sub>2</sub>                                      | 50        | 2.77                                | 861.4345                    | 861.4423                     |
| 35 | H-FQFQF(m-F)K-NH <sub>2</sub>                                      | 52        | 2.90                                | 861.4345                    | 861.4324                     |
| 36 | H-F(m-F)QFQF(m-F)K-NH <sub>2</sub>                                 | 45        | 3.05                                | 879.4251                    | 879.4246                     |

<sup>[a]</sup> Retention time obtained by the use of a Hitachi Chromaster system (HPLC 5260 autosampler, Chromaster HPLC 5160 Pump, Chromaster HPLC 5310 column and Chromaster HPLC 5430 diode array detector). Peptides were analyzed using a Chromolith column (HR RP-18 50-4.6 mm) with a gradient from 1% to 100% of acetonitrile over 5 min at a flow rate of 3 mL/min. The mobile phase consists of 0.1% TFA in acetonitrile and 0.1% TFA in Milli-Q water.



## VIII. Rheological data (frequency sweep)

### 1. H-FQFQFK-NH<sub>2</sub>

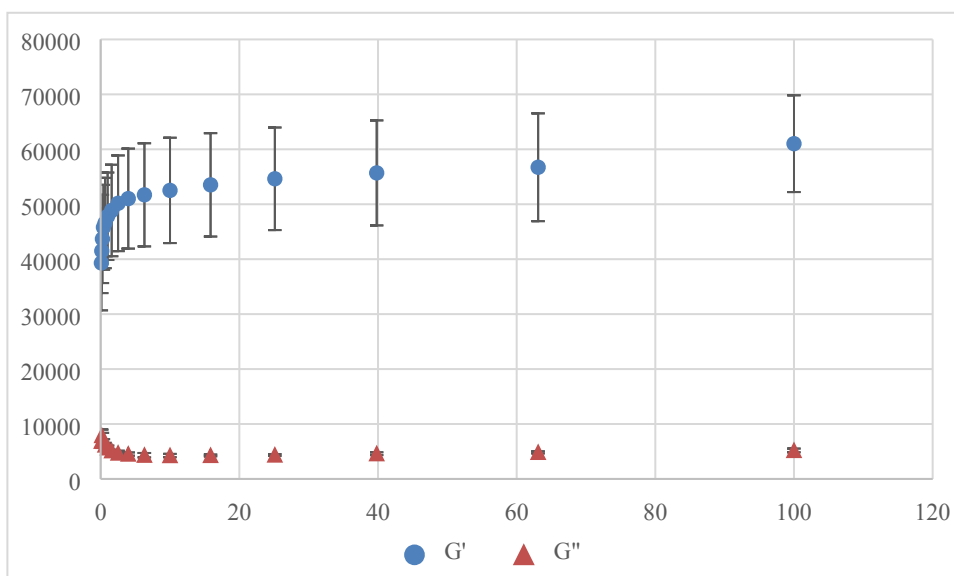

### 5. H-F(p-I)QFQFK-NH<sub>2</sub>

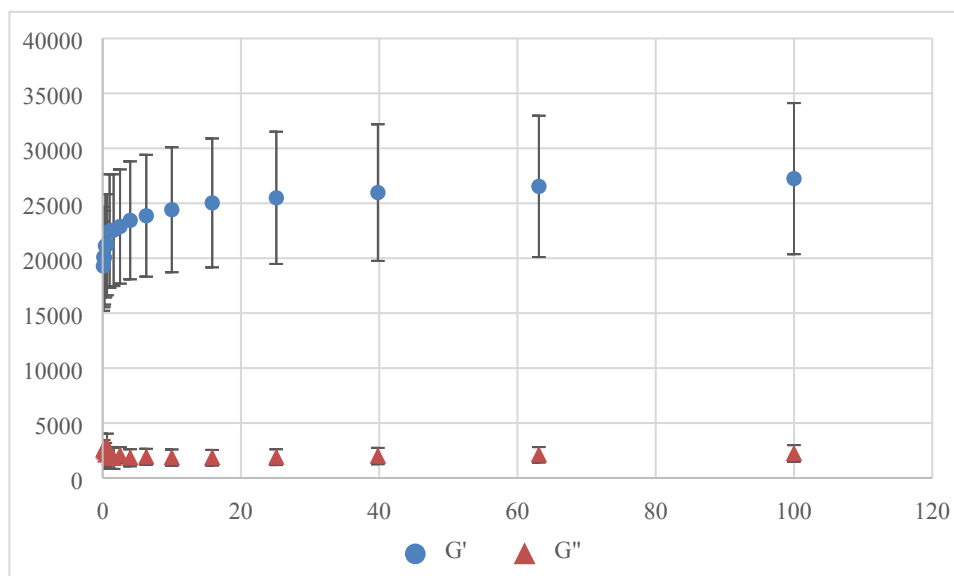

## 6. H-FQF(p-I)QFK-NH<sub>2</sub>

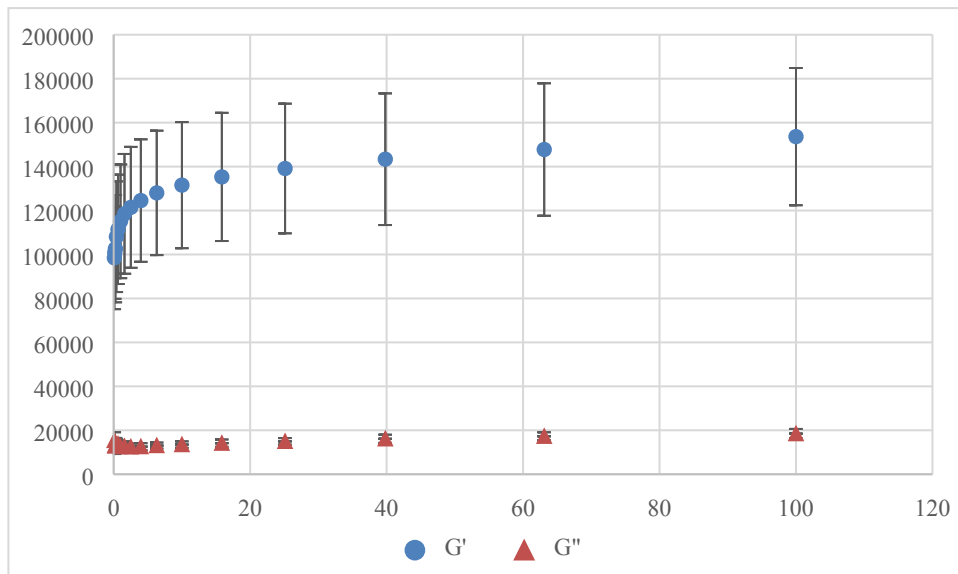

## 7. H-FQFQF(p-I)K-NH<sub>2</sub>

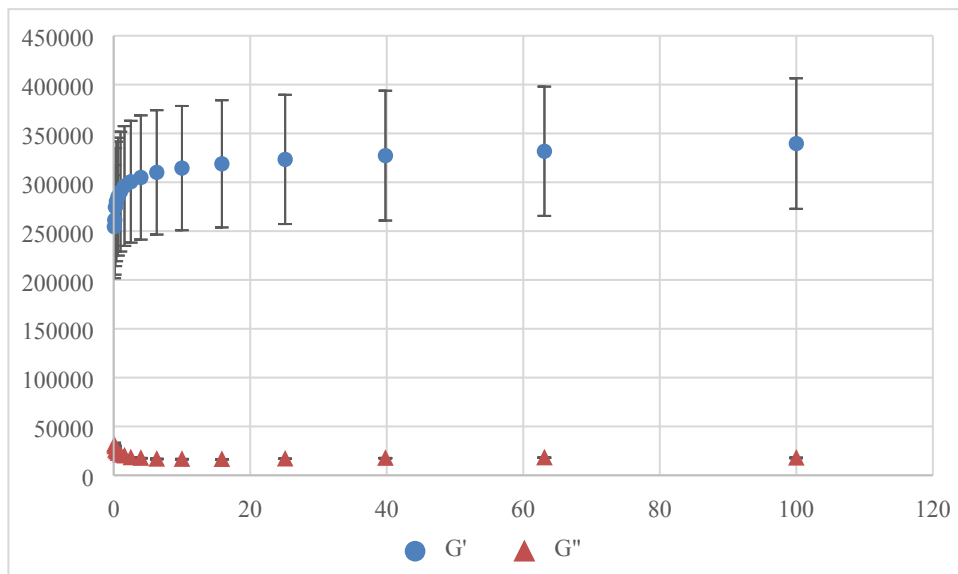

### 8. H-F(m-I)QFQFK-NH<sub>2</sub>

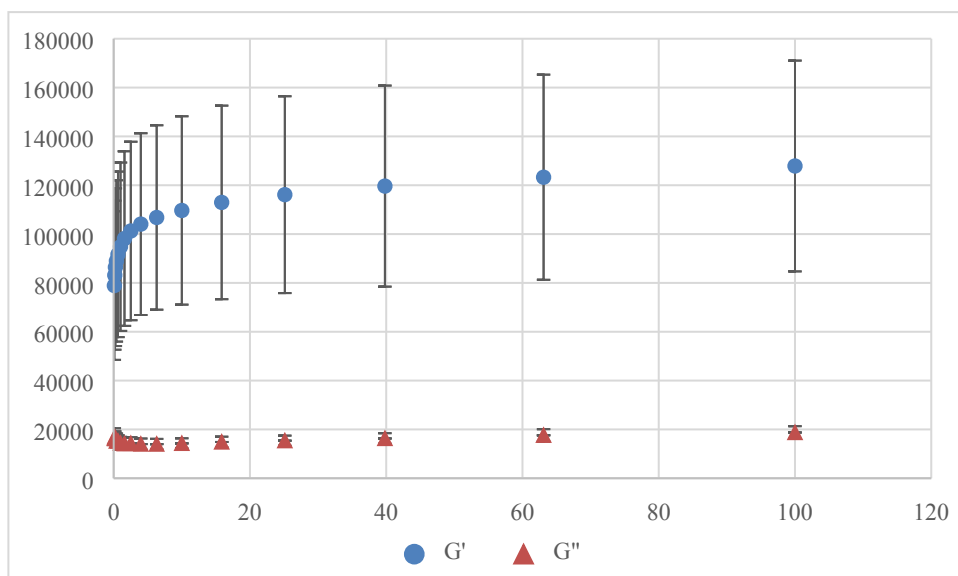

### 9. H-FQF(m-I)QFK-NH<sub>2</sub>

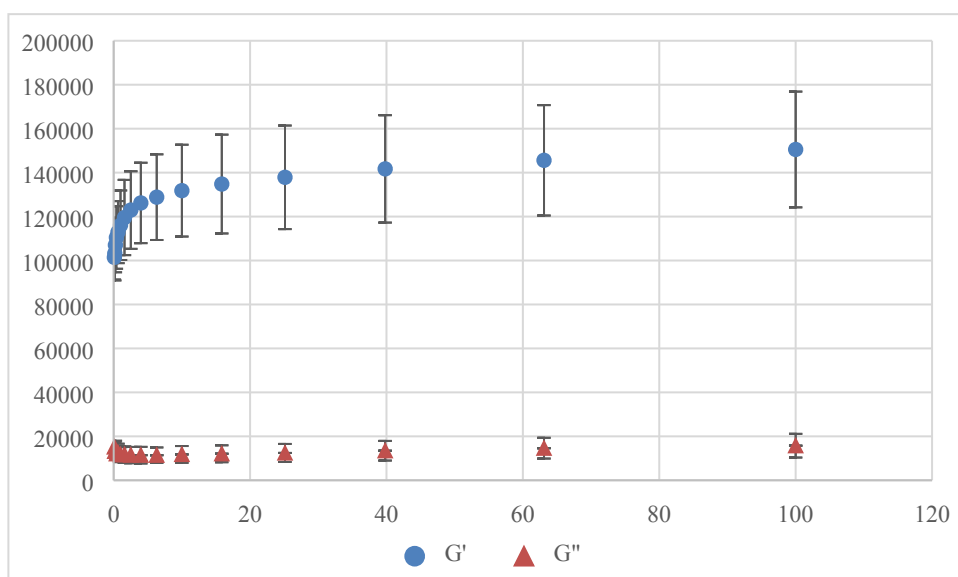

### 11. H-F(o-I)QFQFK-NH<sub>2</sub>

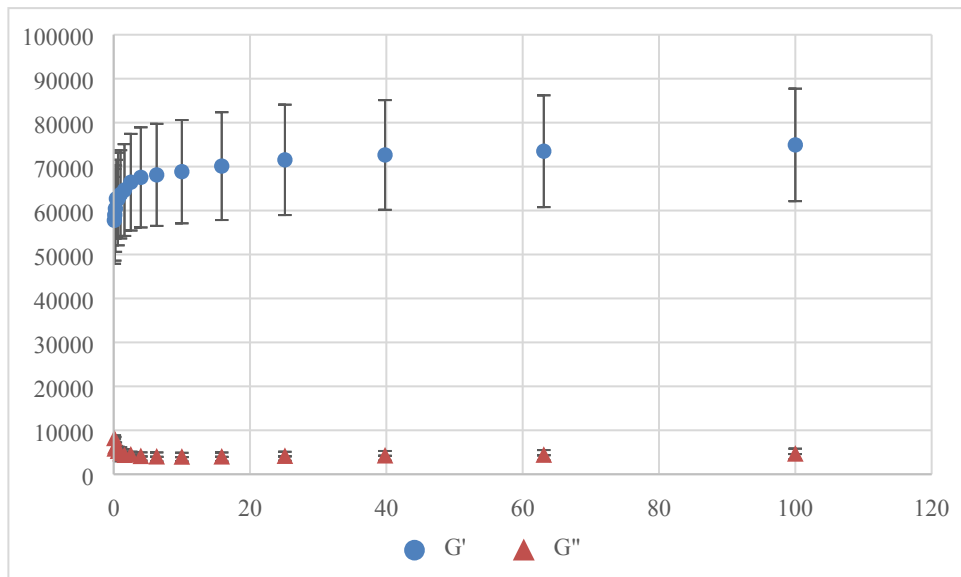

### 12. H-FQF(o-I)QFK-NH<sub>2</sub>

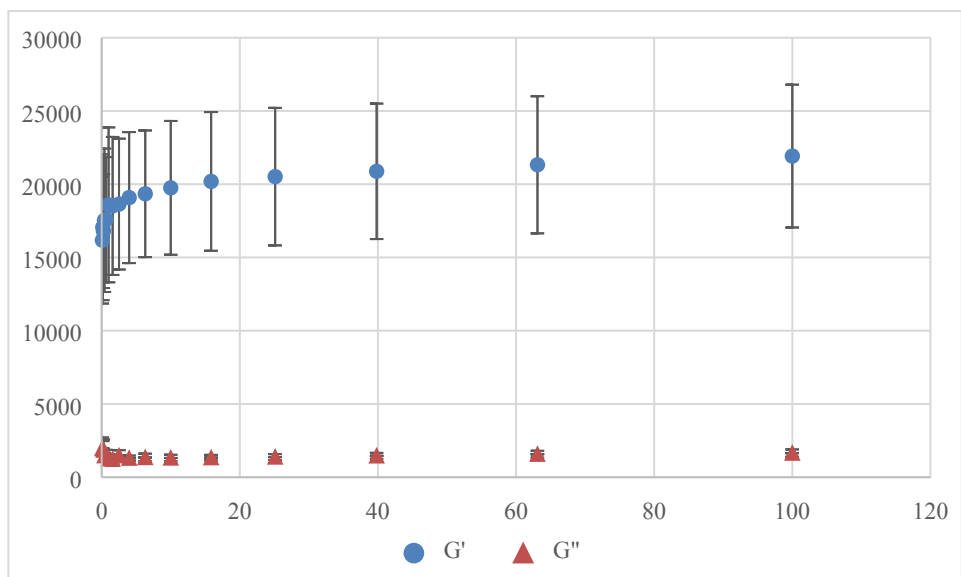

### 13. H-FQFQF(o-I)K-NH<sub>2</sub>

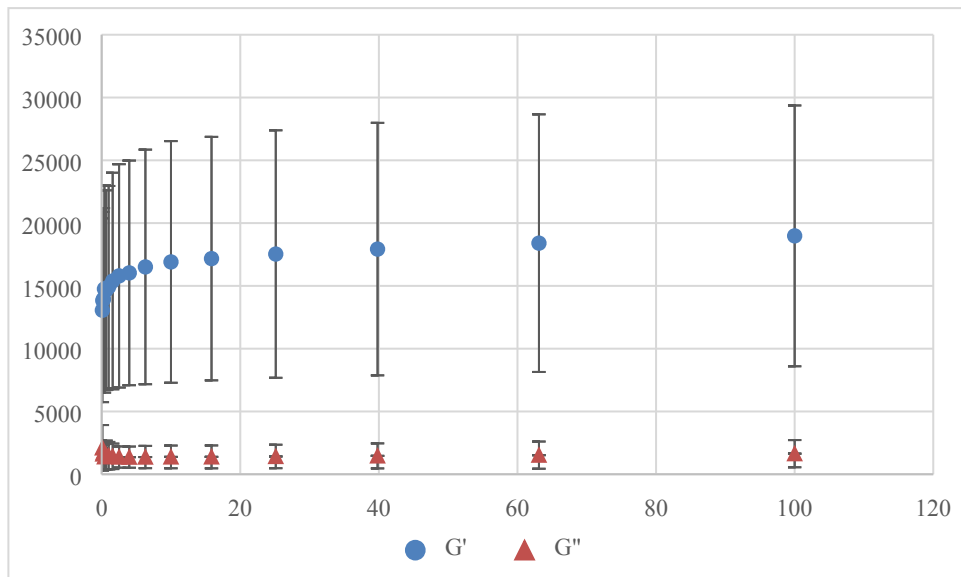

### 15. H-F(m-I)QFQF(m-I)K-NH<sub>2</sub>

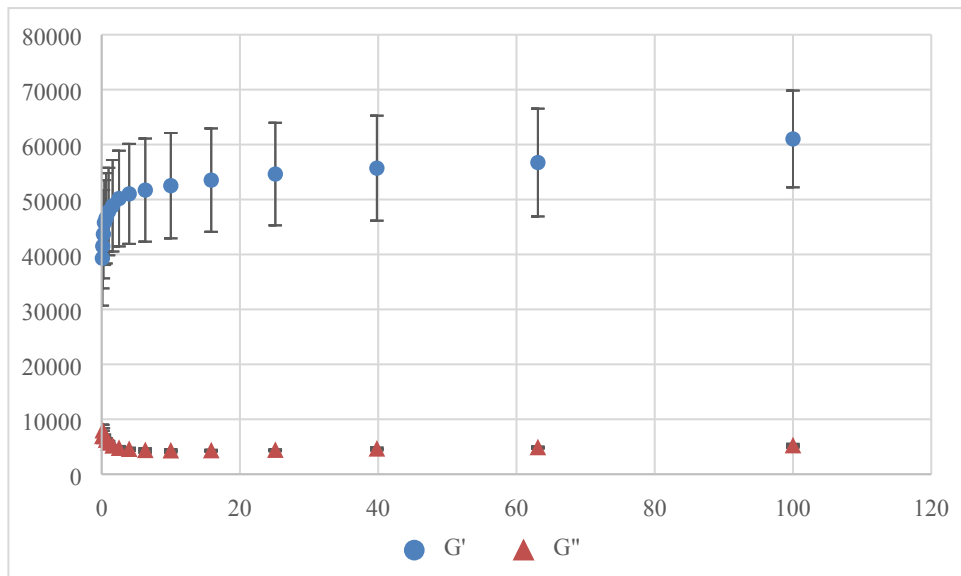

### 18. H-F(m-I)QF(m-I)QF(m-I)K-NH<sub>2</sub>

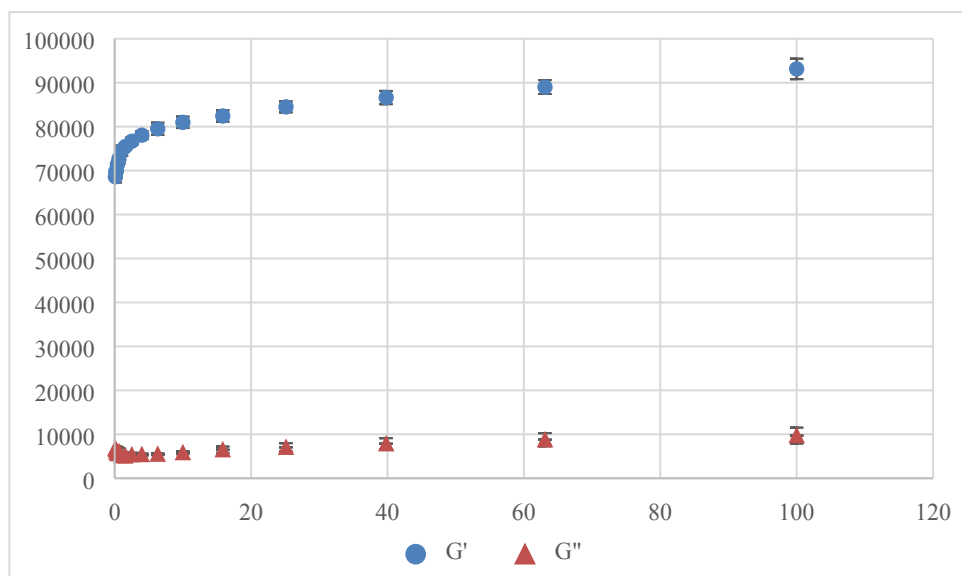

### 19. H-FQFQF(p-Br)K-NH<sub>2</sub>

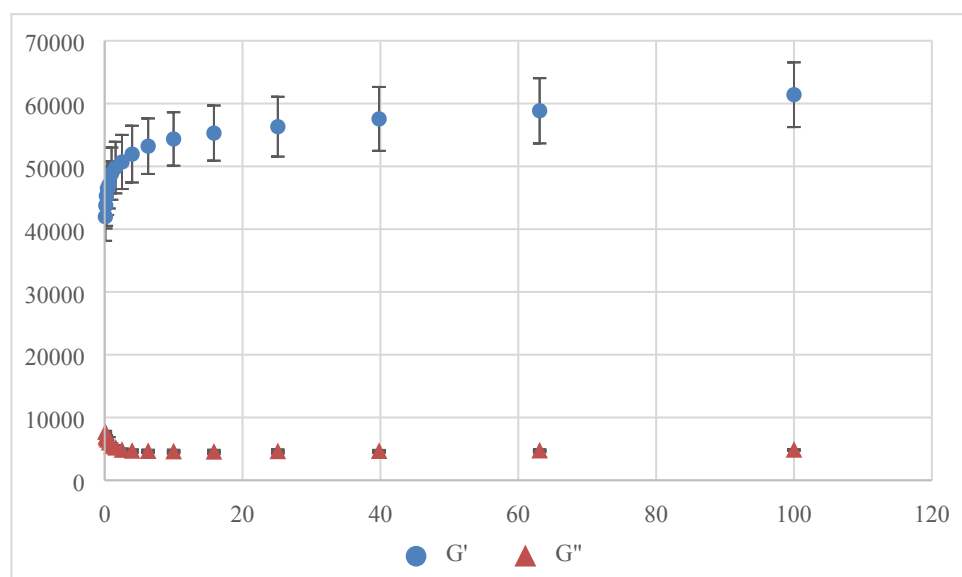

## 20. H-F(m-Br)QFQFK-NH<sub>2</sub>

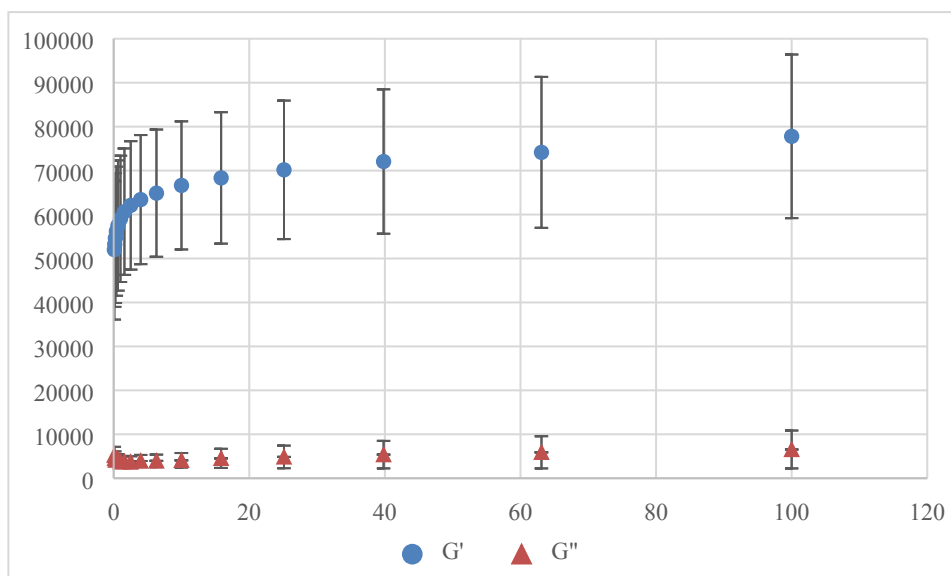

## 21. H-FQF(m-Br)QFK-NH<sub>2</sub>

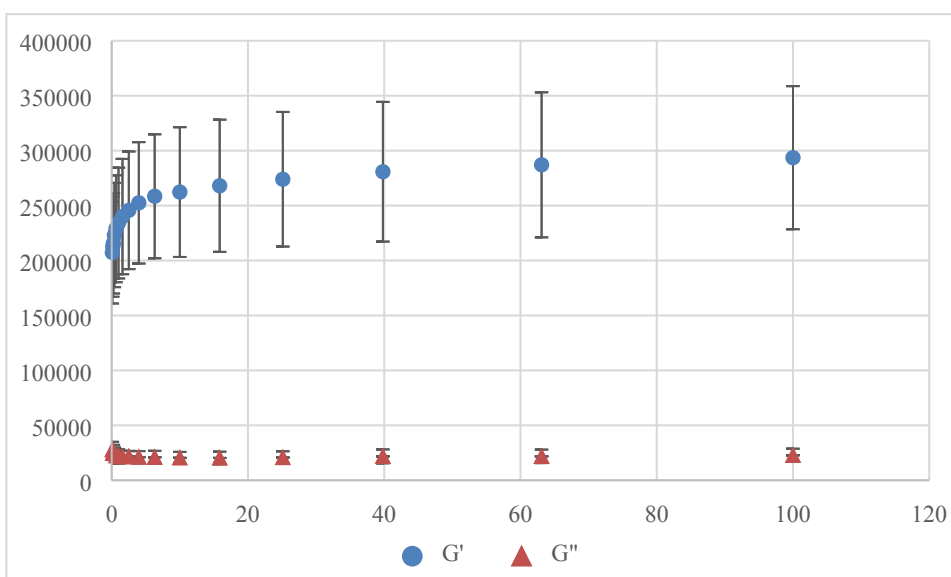

## 22. H-FQFQF(m-Br)K-NH<sub>2</sub>

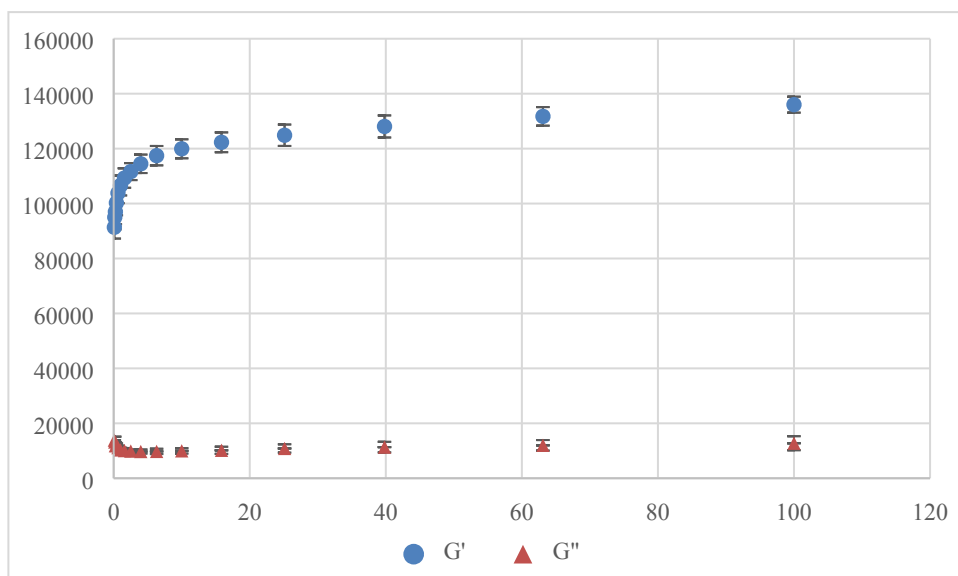

## 24. H-F(m-Br)QFQF(m-Br)K-NH<sub>2</sub>

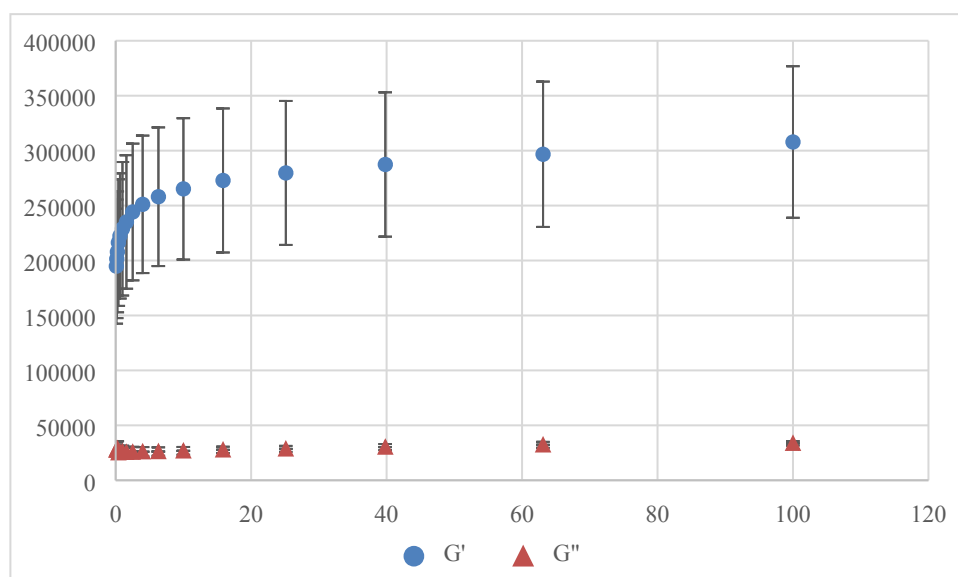



## 26. H-F(m-Br)QF(m-Br)QF(m-Br)K-NH<sub>2</sub>

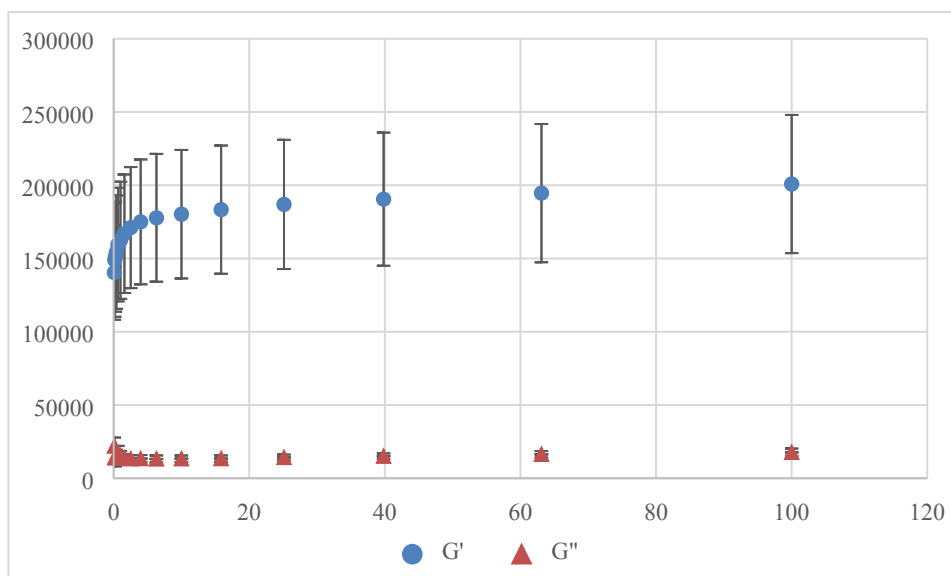

## 27. H-FQFQF(p-Cl)K-NH<sub>2</sub>

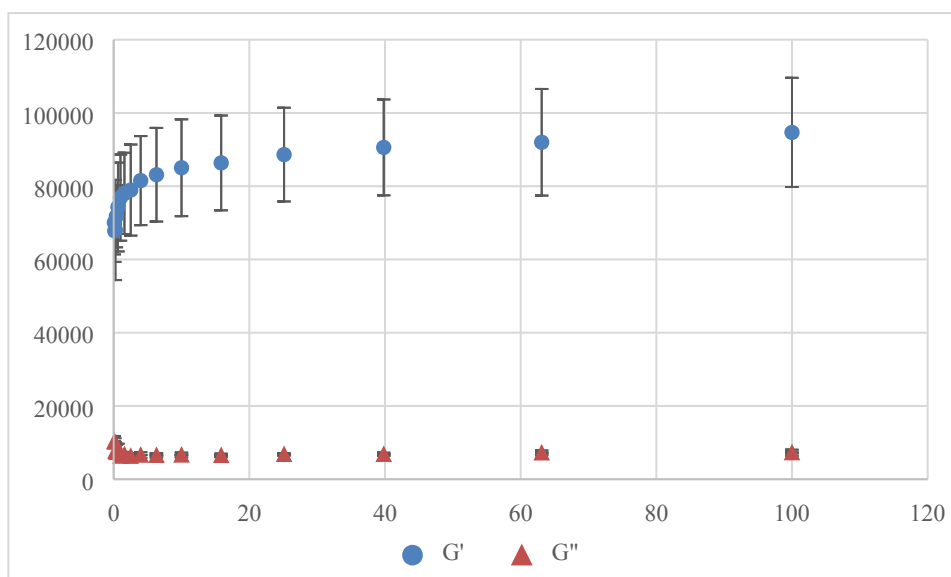

### 28. H-F(m-Cl)QFQFK-NH<sub>2</sub>

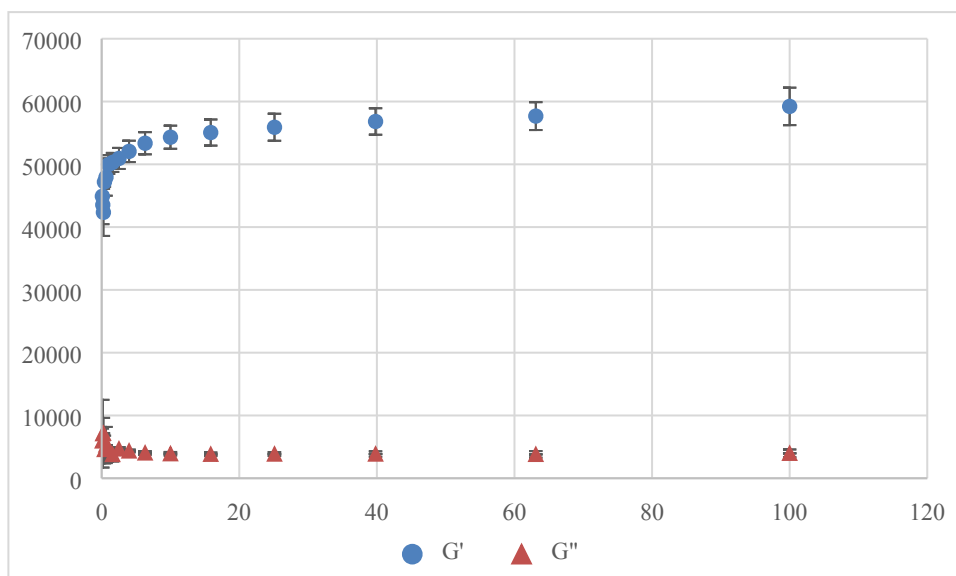

### 29. H-FQF(m-Cl)QFK-NH<sub>2</sub>

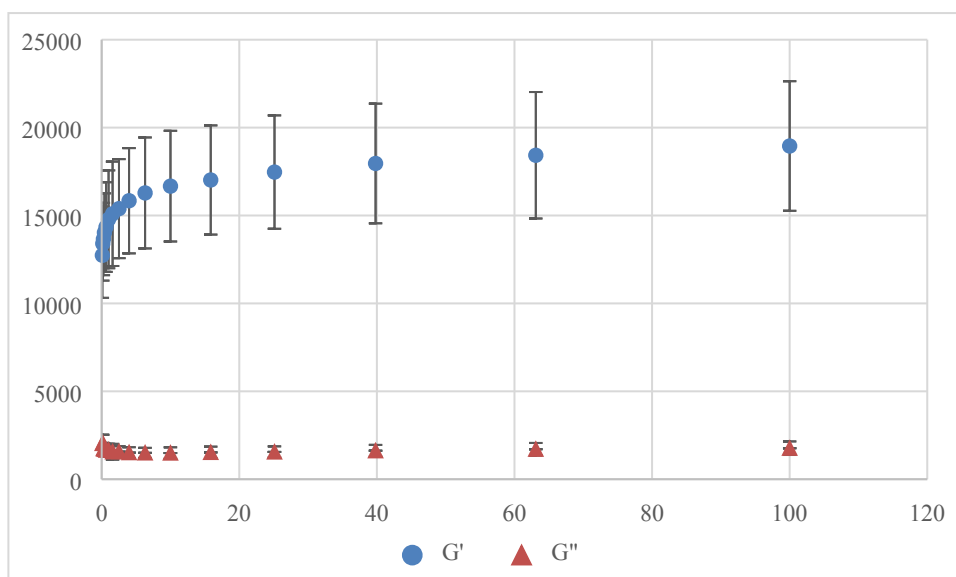

### 30. H-FQFQF(mCl)K-NH<sub>2</sub>

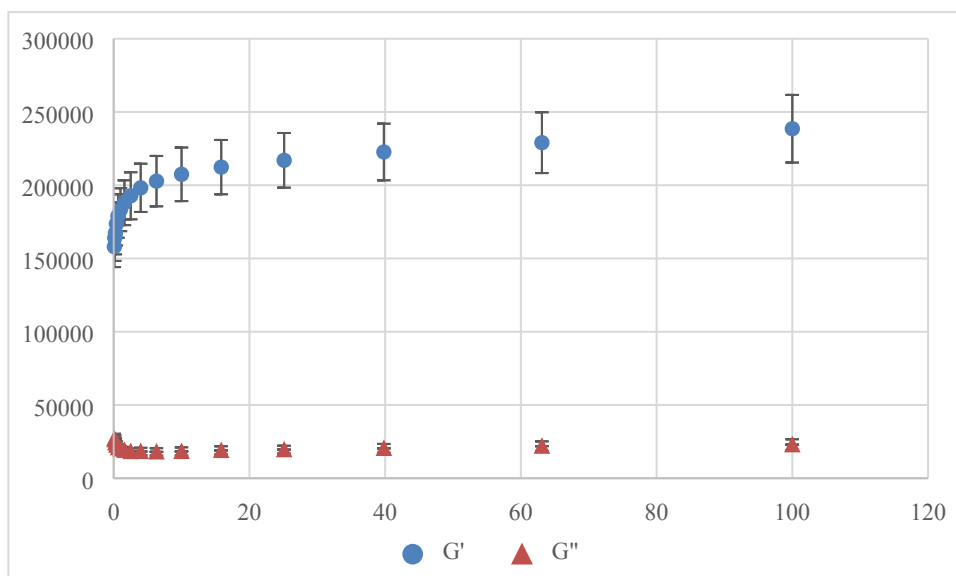

### 31. H-F(m-Cl)QFQF(m-Cl)K-NH<sub>2</sub>

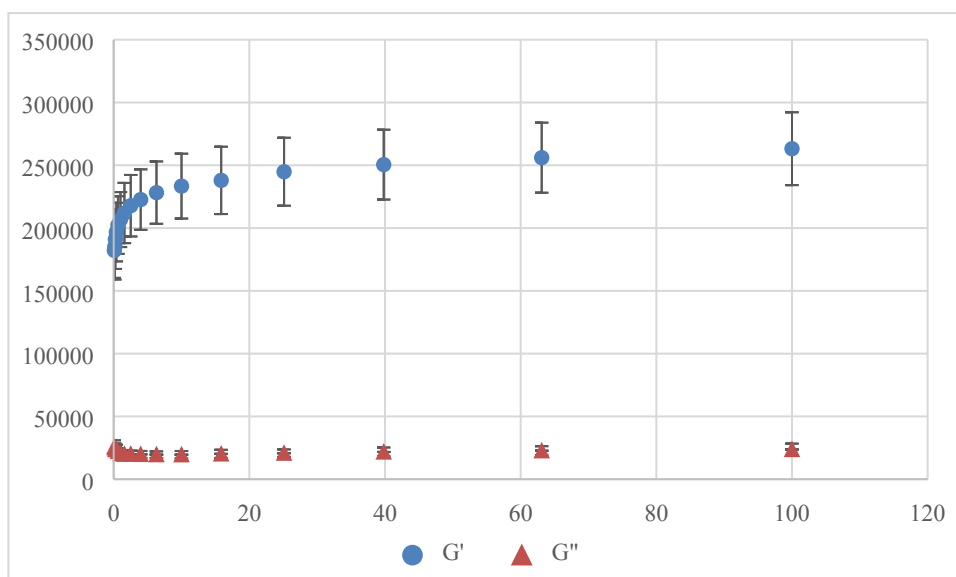

### 33. H-F(m-F)QFQFK-NH<sub>2</sub>

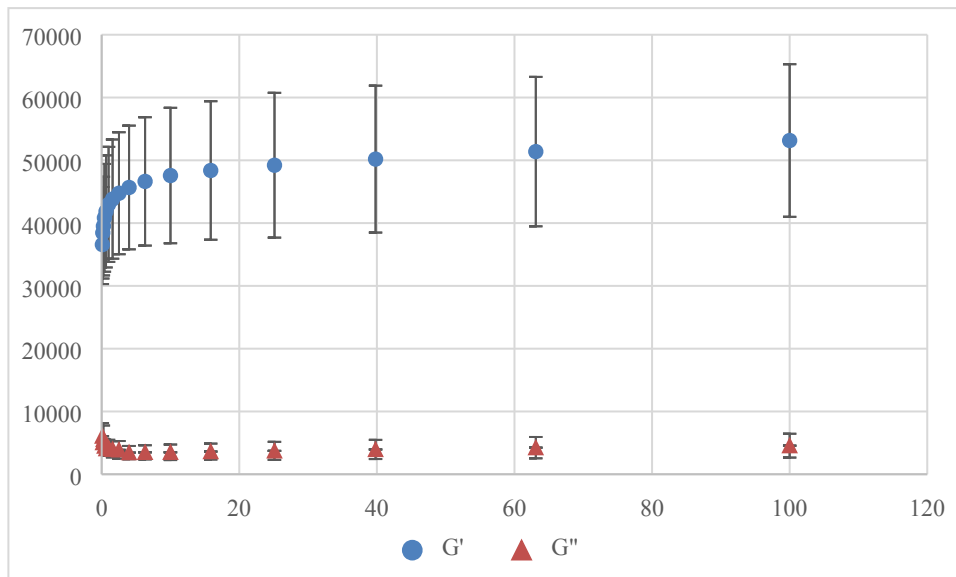

### 34. H-FQF(m-F)QFQFK-NH<sub>2</sub>

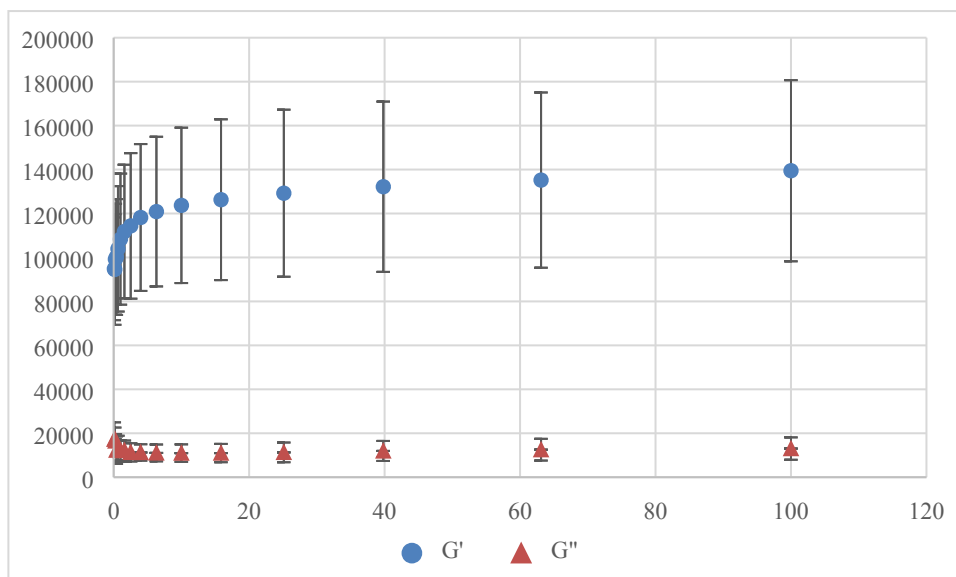

### 35. H-FQFQF(m-F)K-NH<sub>2</sub>

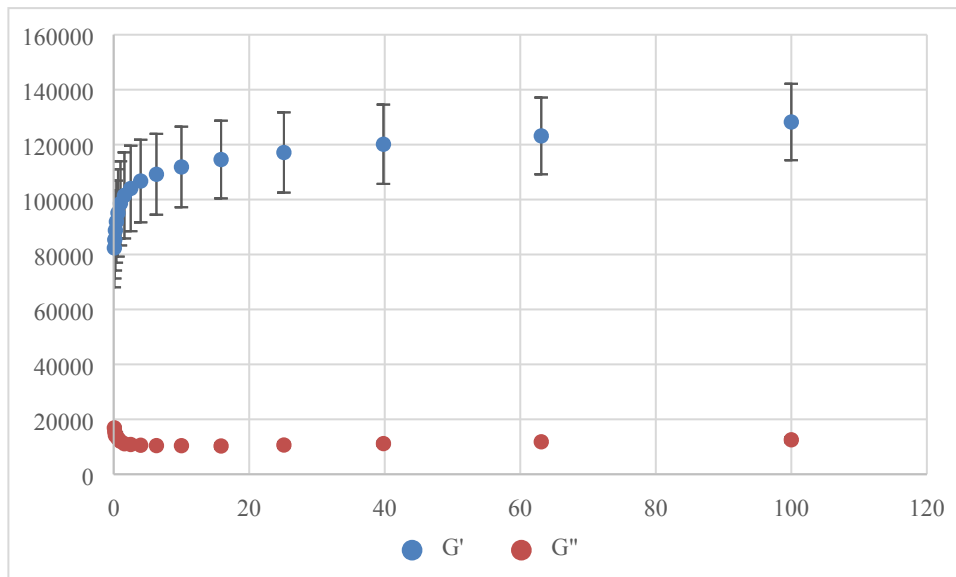

### 36. H-F(m-F)QFQF(m-F)K-NH<sub>2</sub>

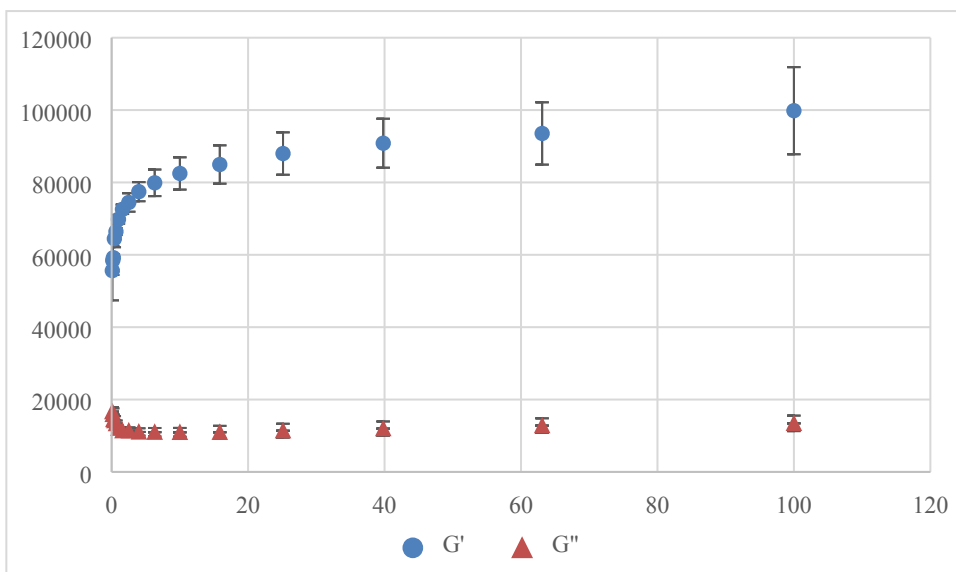

Supplement: d1ma00455g1.pdf [file d1ma00455g1.pdf]
